# Supplementary material for: Capturing Amyloid-β Oligomers by Stirring with Microscaled Iron Oxide Stir Bars into Magnetic Plaques to Reduce Cytotoxicity toward Neuronal Cells
Source: MDPI journal article supplement (doi:10.3390/nano10071284), 2020-06-30
Supplement: s1 [file s1]

## Supplementary Materials

### **Capturing amyloid- $\beta$ oligomers by stirring with microscaled iron oxide stir bars into magnetic plaques to reduce cytotoxicity toward neuronal cells**

Yuan-Chung Tsai, Jing-Chian Luo, Te-I Liu, I-Lin Lu, Ming-Yin Shen, Chun-Yu Chuang, Chorng-Shyan Chern and Hsin-Cheng Chiu\*

Dr. Yuan-Chung Tsai, Mr. Jing-Chian Luo, Dr. Te-I Liu, Dr. I-Lin Lu, Dr. Ming-Yin Shen, Prof. Chun-Yu Chuang, and Prof. Hsin-Cheng Chiu

Department of Biomedical Engineering and Environmental Sciences, National Tsing Hua University, Hsinchu 30013, Taiwan

E-mail addresses: hscchiu@mx.nthu.edu.tw (H.-C. Chiu)

Dr. I-Lin Lu

Department of Surgery, Hsinchu Mackay Memorial Hospital, Hsinchu 30071, Taiwan

Dr. Ming-Yin

Department of Surgery, China Medical University Hospital-Hsinchu Branch, Hsinchu 30059, Taiwan

Prof. Chorng-Shyan Chern

Department of Chemical Engineering, National Taiwan University of Science and Technology, Taipei 10607, Taiwan

|                            |    |
|----------------------------|----|
| Supplementary Figures..... | 03 |
| Supplementary Table.....   | 16 |

## Supplementary Figures

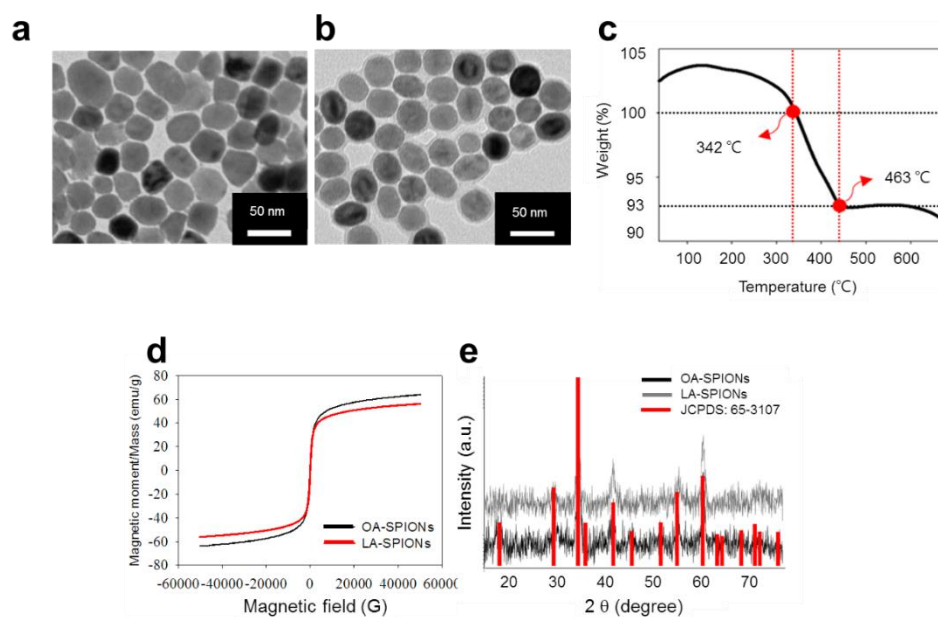

**Fig. S1** Characterization of SPIONs. (a) TEM image of OA-SPIONs and (b) TEM image of LA/OA-SPIONs. Scale bar: 50 nm. (c) TGA measurement of OA-SPIONs. (d) Field-dependent magnetic curves of OA-SPIONs (black line) and LA/OA-SPIONs (red line) measured at the same Fe concentration. (e) XRD patterns of OA-SPIONs and LA/OA-SPIONs.

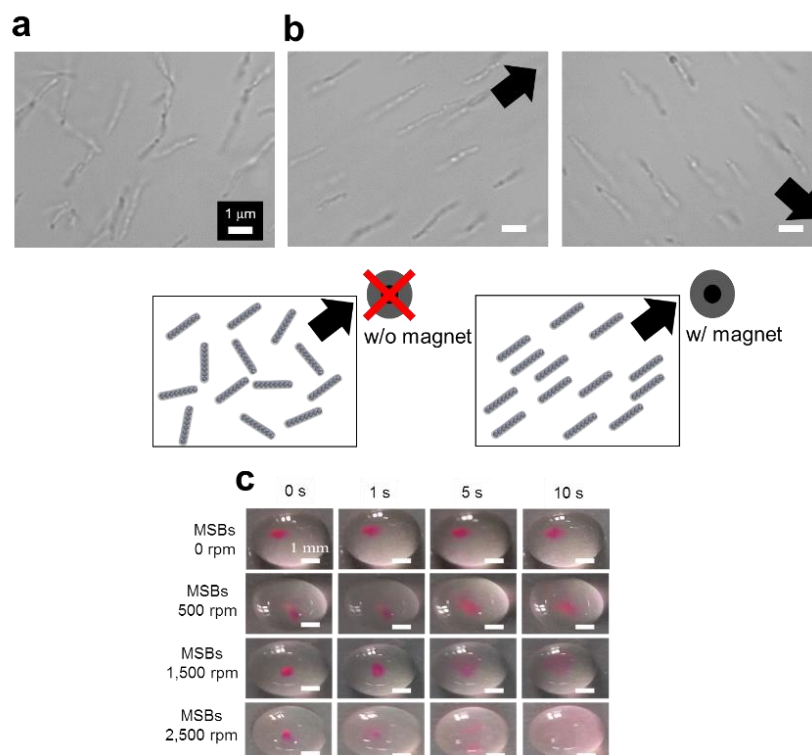

**Fig. S2** Alignment of MSBs examined by optical microscopy. **(a)** The random localization of MSBs in the absence of external magnet. **(b)** Uniform alignment of MSBs in accordance to the magnet (black arrows). **(c)** Dispersion of rhodamine B in water droplets by magnetic stirring with MSBs under rotating magnetic field.

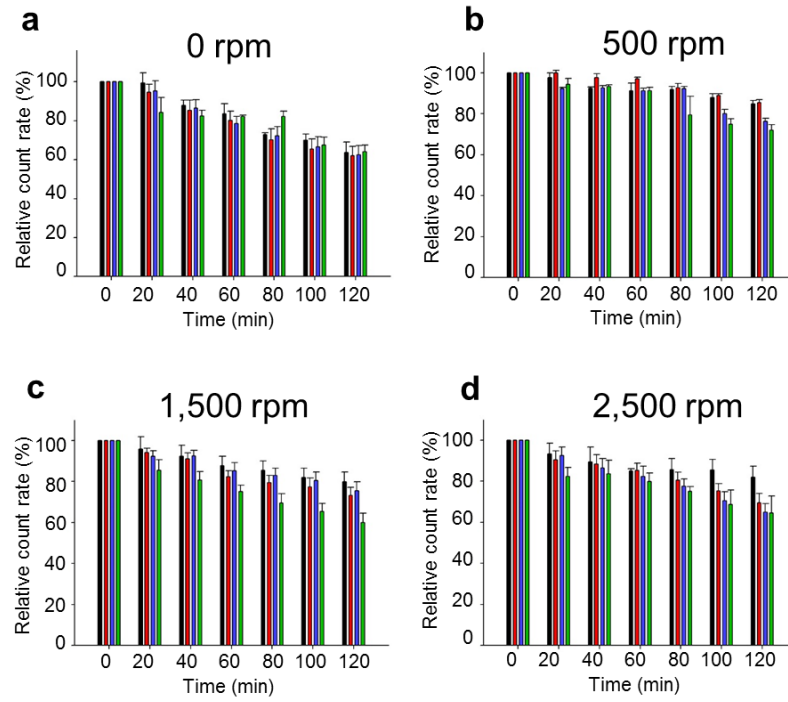

**Fig. S3** Colloidal stability over 120 min in different aqueous milieus. Count rates of MSBs in DI water (—), DMEM (—), DMEM containing 10% FBS (—) and PBS (—) at different time intervals with various magnetic stirring speeds: (a) 0, (b) 500, (c) 1,500 and (d) 2,500 rpm. Error bars represent mean  $\pm$  s.d. (n = 6).

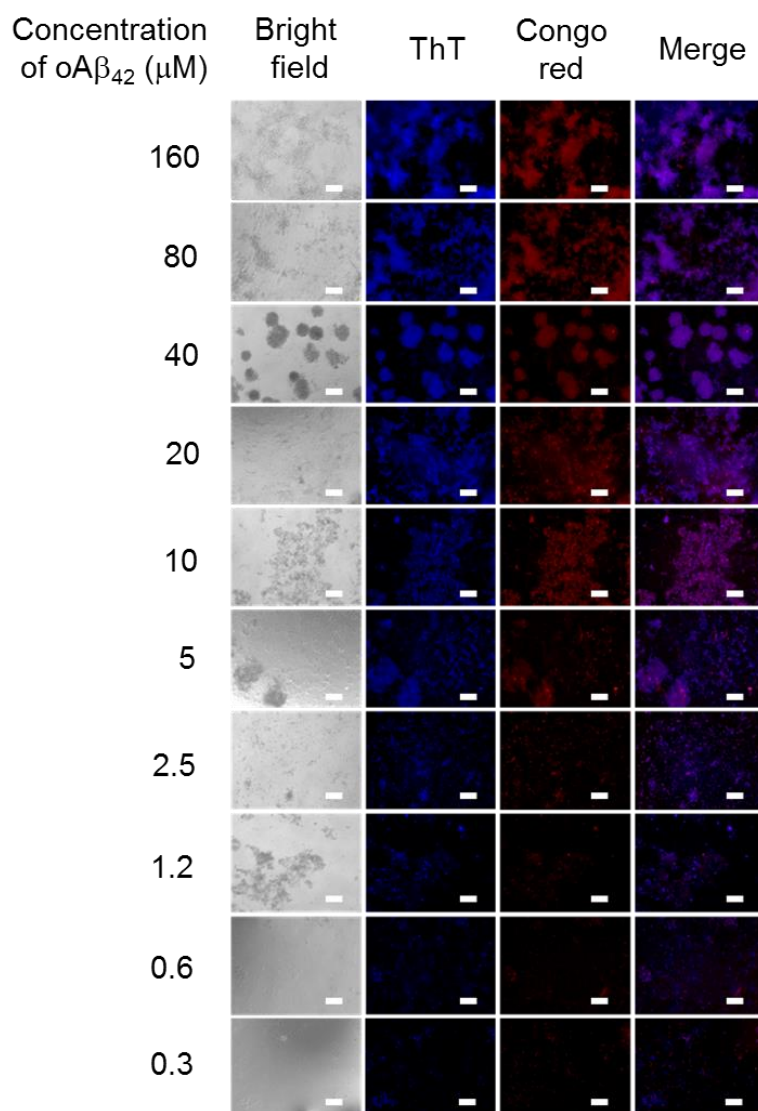

**Fig. S4** Pronounced effect of capturing oA $\beta_{42}$  by magnetic stirring (2,500 rpm) with MSBs (144  $\mu$ g/mL) into aggregates was observed by LSCM (n = 10). The oA $\beta_{42}$  was stained with ThT and CR. Scale bar: 100  $\mu$ m.

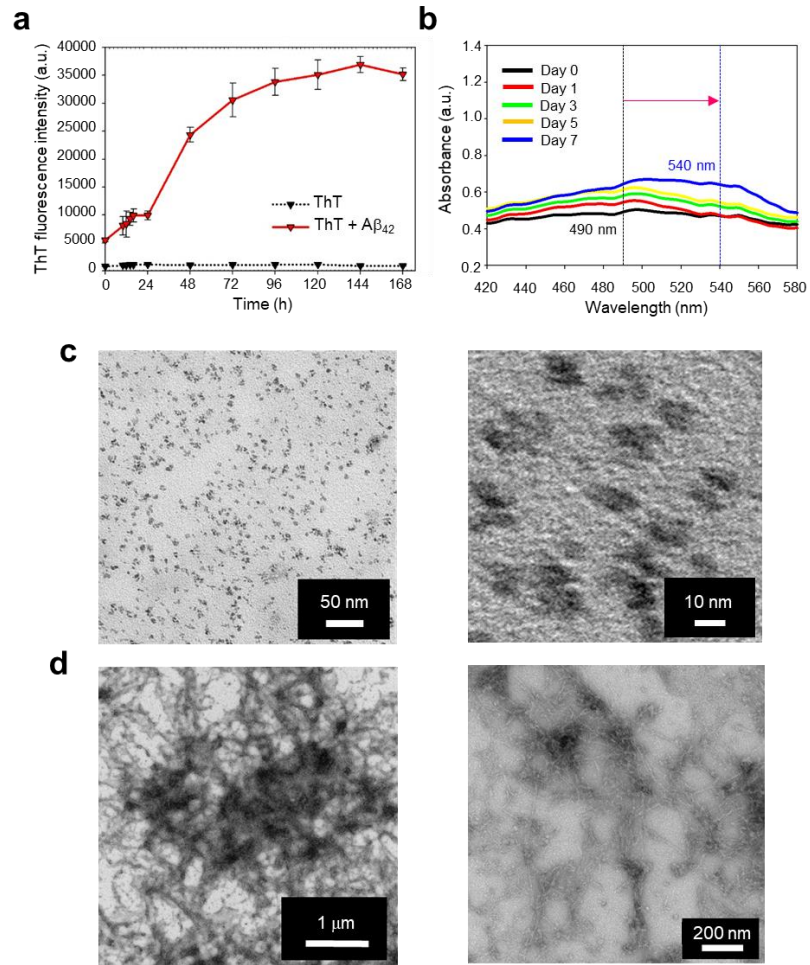

**Fig. S5** Detailed structural characterizations of npA $\beta_{42}$ . **(a)** Fluorescence intensity of ThT in aqueous solution of A $\beta_{42}$  (20  $\mu$ M) as a function of time. **(b)** CR absorption spectra (420-580 nm) of A $\beta_{42}$  (20  $\mu$ M) with different incubation time intervals. **(c)** TEM and HR-TEM images of oA $\beta_{42}$ . **(d)** TEM and HR-TEM images of npA $\beta_{42}$ .

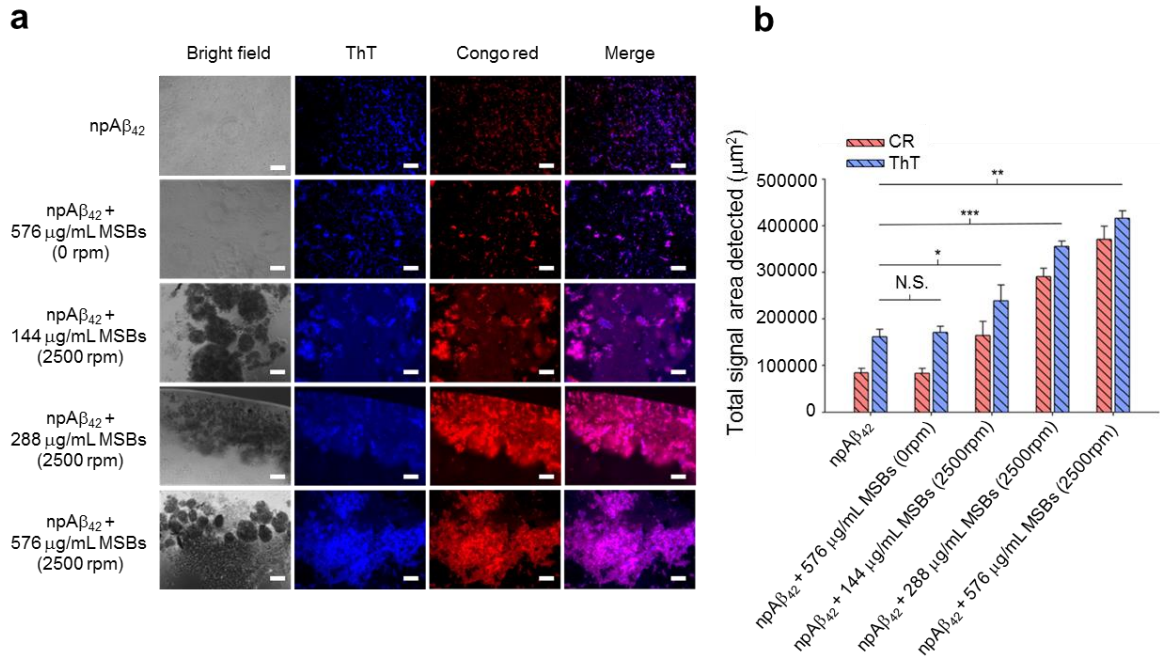

**Fig. S6** Capture of npA $\beta_{42}$  into large aggregates by MSB stirring ( $n = 10$ ). **(a)** Fluorescence images of npA $\beta_{42}$  treated with magnetic stirring as a function of the concentration of MSBs at 2,500 rpm for 20 min. The A $\beta_{42}$  concentration was 20  $\mu$ M. The npA $\beta_{42}$  was attained from incubation of oA $\beta_{42}$  in PBS under mild shaking at 37°C for 7 days. Scale bar: 100  $\mu$ m. **(b)** Total signal areas of large aggregates by ThT and CR staining. \*\*\* $P < 0.005$ , \*\* $P < 0.01$ , \* $P < 0.05$  and N.S.  $P > 0.05$ . Error bars represent mean  $\pm$  s.d. ( $n = 10$ ).



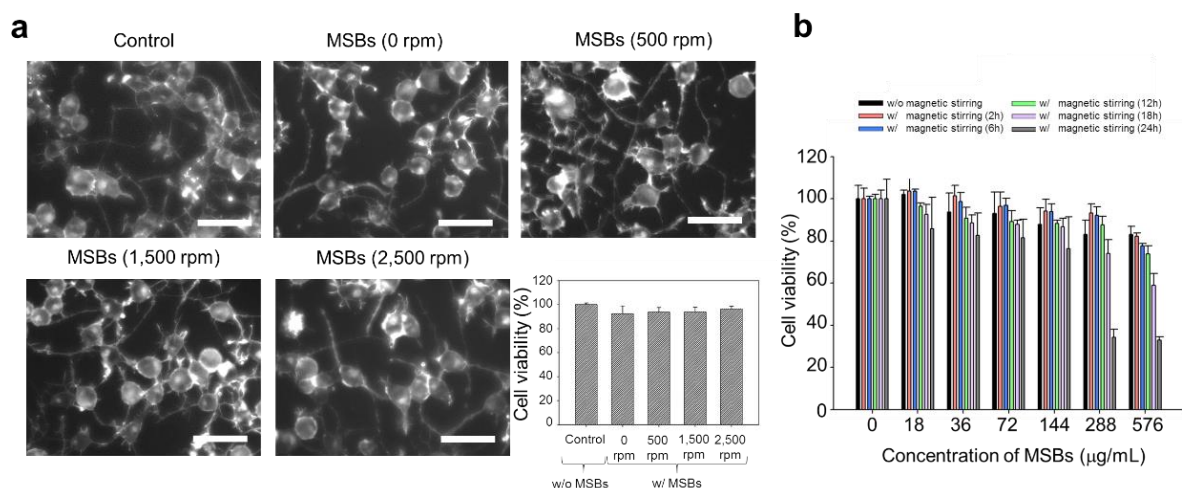

**Fig. S7 (a)** LSCM images of the neuron (N2a) outgrowth with magnetic stirring of various speeds for 2 h (MSB  $144 \mu\text{g mL}^{-1}$ ). Cytoskeleton was stained with F-actin marker. Scale bar:  $100 \mu\text{m}$ . The viability of N2a cells receiving the magnetic stirring treatment with MSBs ( $144 \mu\text{g mL}^{-1}$ ) at various stirring speeds. **(b)** Cell viability of N2a cells after the capture of  $\text{oA}\beta_{42}$  by magnetic stirring with MSBs of different concentrations at 2,500 rpm for preset time intervals. The cell viability was evaluated by MTT assay. Error bars represent mean  $\pm$  s.d. ( $n = 6$ ).

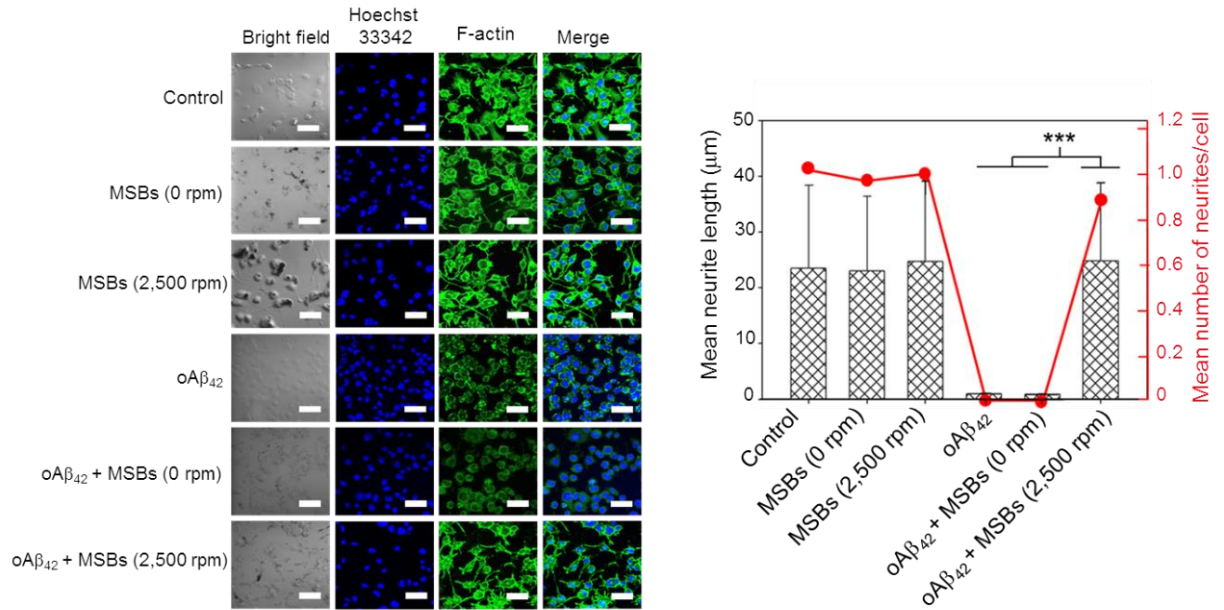

**Fig. S8** Representative LSCM images of N2a cells before and after the magnetic stirring treatment. LSCM images of N2a cells treated with either oAβ<sub>42</sub> only or oAβ<sub>42</sub>/MSBs (oAβ<sub>42</sub> concentration: 160 μM; MSB 144 μg mL<sup>-1</sup>) with and without magnetic stirring (2,500 rpm) for 2 h (n = 6). The cell nuclei and cytoskeleton were stained with Hoechst 33342 and F-actin marker, respectively. Scale bar: 50 μm. Quantitative data of neurite length (μm) and number with and without magnetic stirring treatment are also included. \*\*\*P < 0.005. Error bars represent mean ± s.d. (n = 6).

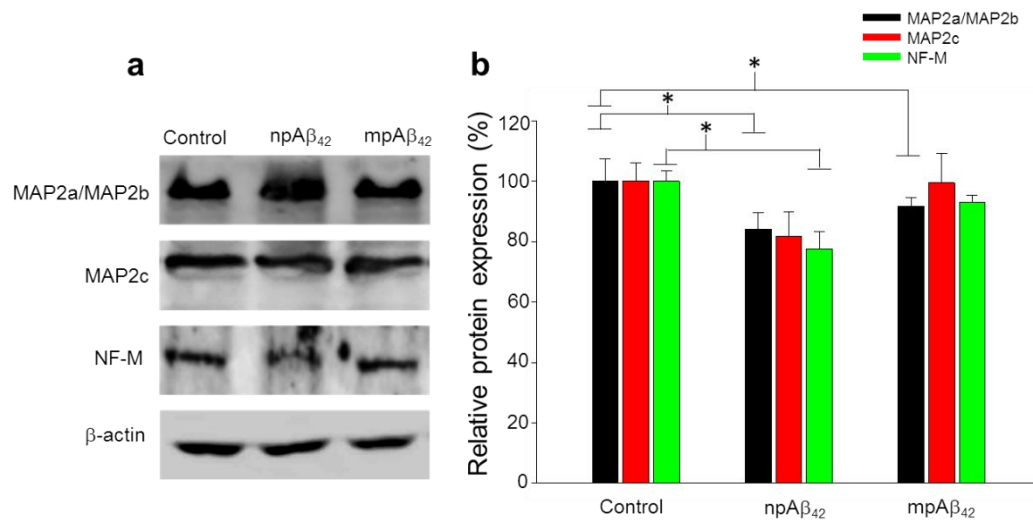

**Fig. S9** Neuron-specific protein expression of N2a cells treated either with npAβ<sub>42</sub> or mpAβ<sub>42</sub> (n = 3). **(a)** Effects of npAβ<sub>42</sub> and mpAβ<sub>42</sub> on neuron-specific protein expression (MAP2a/MAP2b, MAP2c, NF-M and NeuN). β-actin was used as the loading control. **(b)** Relative signal intensities of individual neuron-specific proteins from N2a cells after the npAβ<sub>42</sub> or mpAβ<sub>42</sub> treatment. The Aβ<sub>42</sub> concentration was 160 μM. \*P < 0.05. Error bars represent mean ± s.d. (n = 3).

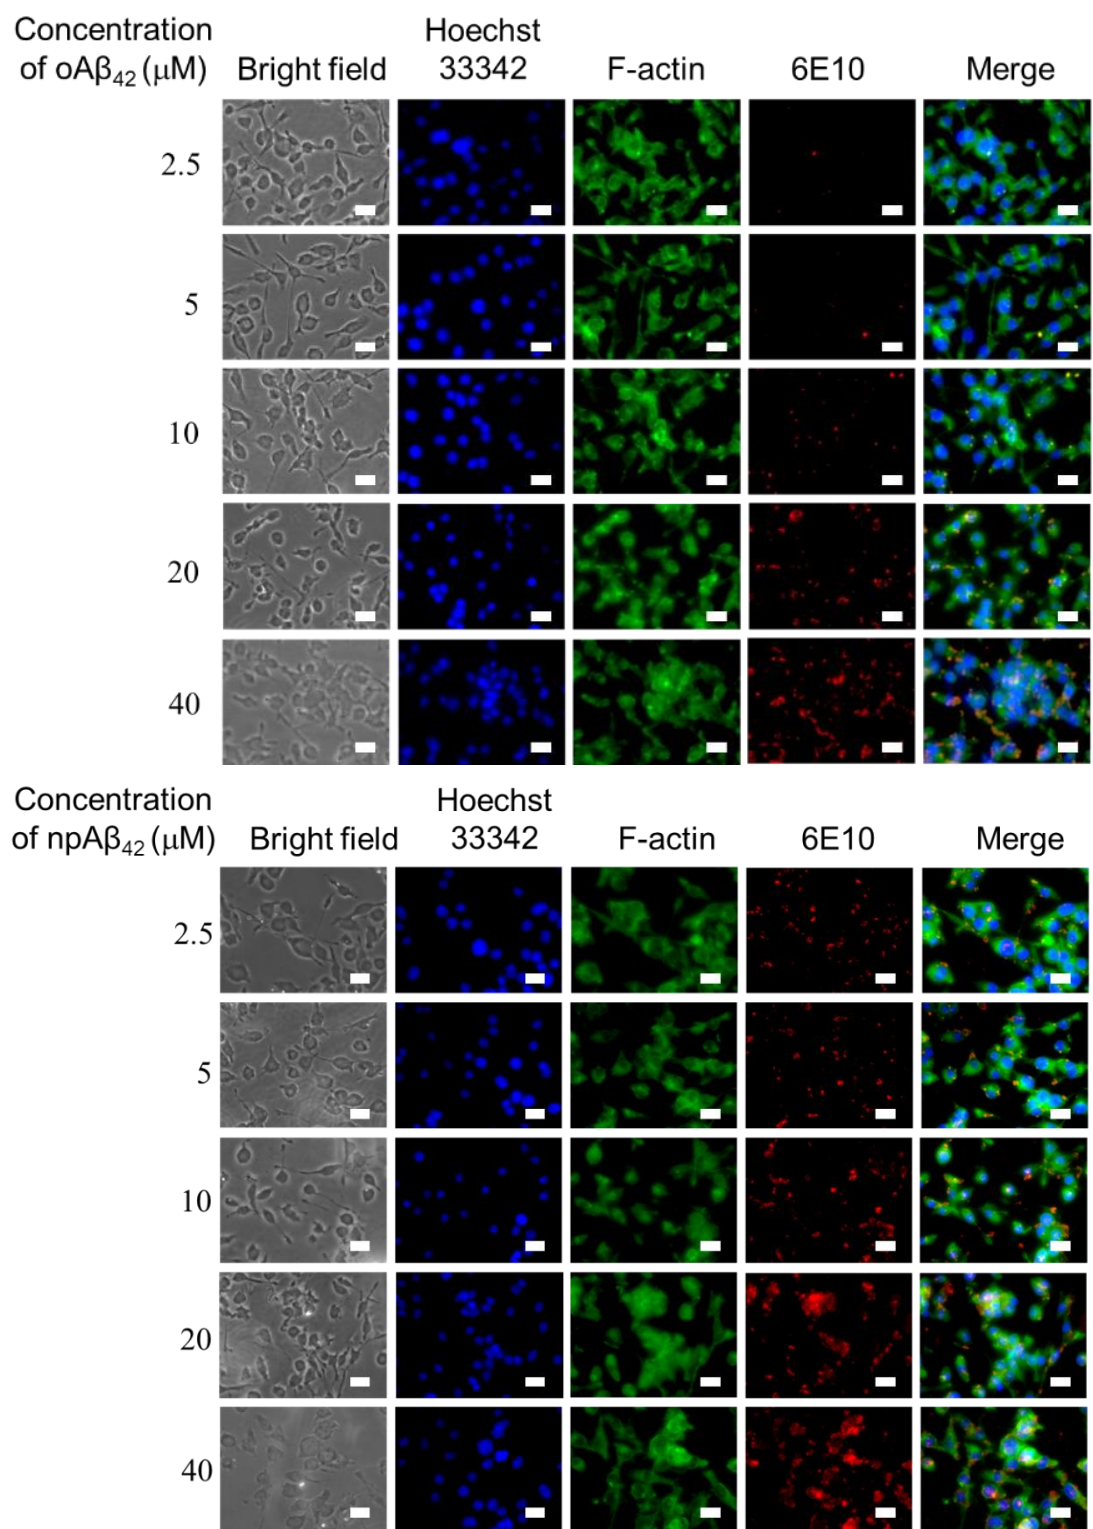

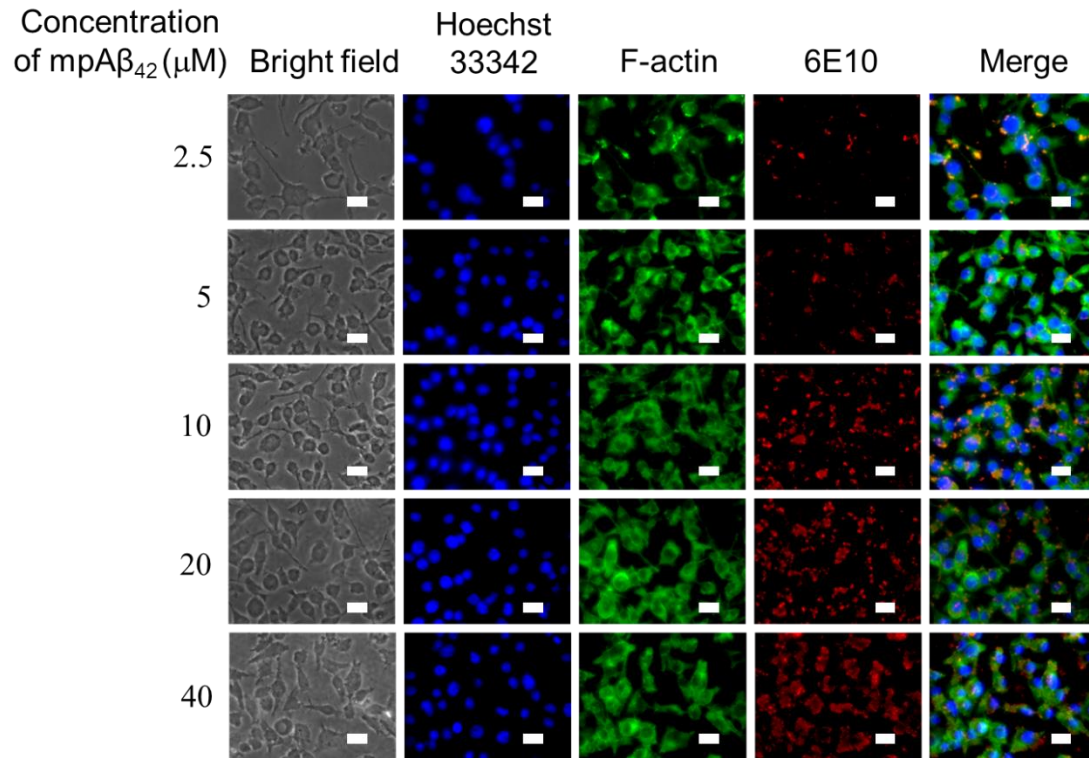

**Fig. S10** Phagocytic actions of BV-2 cells toward oA $\beta_{42}$ , npA $\beta_{42}$  and mpA $\beta_{42}$ . Representative LSCM images of the A $\beta_{42}$  uptake by BV-2 cells ( $n = 8$ ). A $\beta_{42}$  in different forms was IHC-stained using 6E10 as the primary antibody ( $\lambda_{\text{ex}} = 565$  nm,  $\lambda_{\text{em}} = 680\text{-}730$  nm). Cell nuclei and cytoskeleton were stained with Hoechst 33342 and F-actin marker, respectively. Scale bar: 50  $\mu$ m.

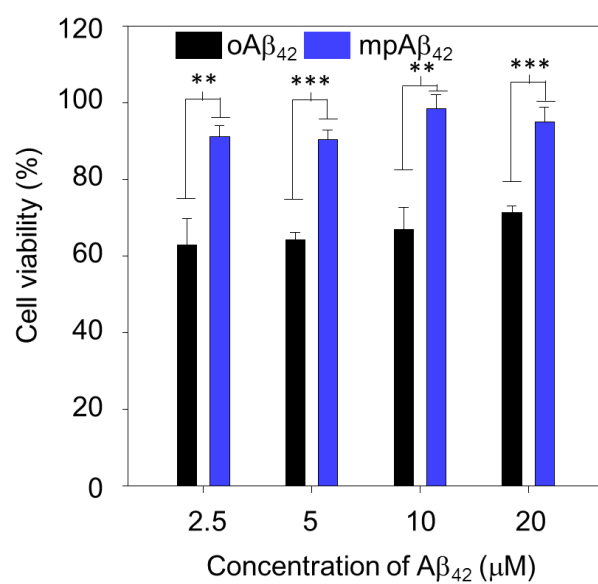

**Fig. S11** Cell viability of N2a cells after 24 h-incubation in conditioned media collected separately from the co-incubations of BV-2 cells with oAβ<sub>42</sub> and BV-2 cells with mpAβ<sub>42</sub>. \*\*\*P < 0.005, \*\*P < 0.01. Error bars represent mean ± s.d. (n = 6).



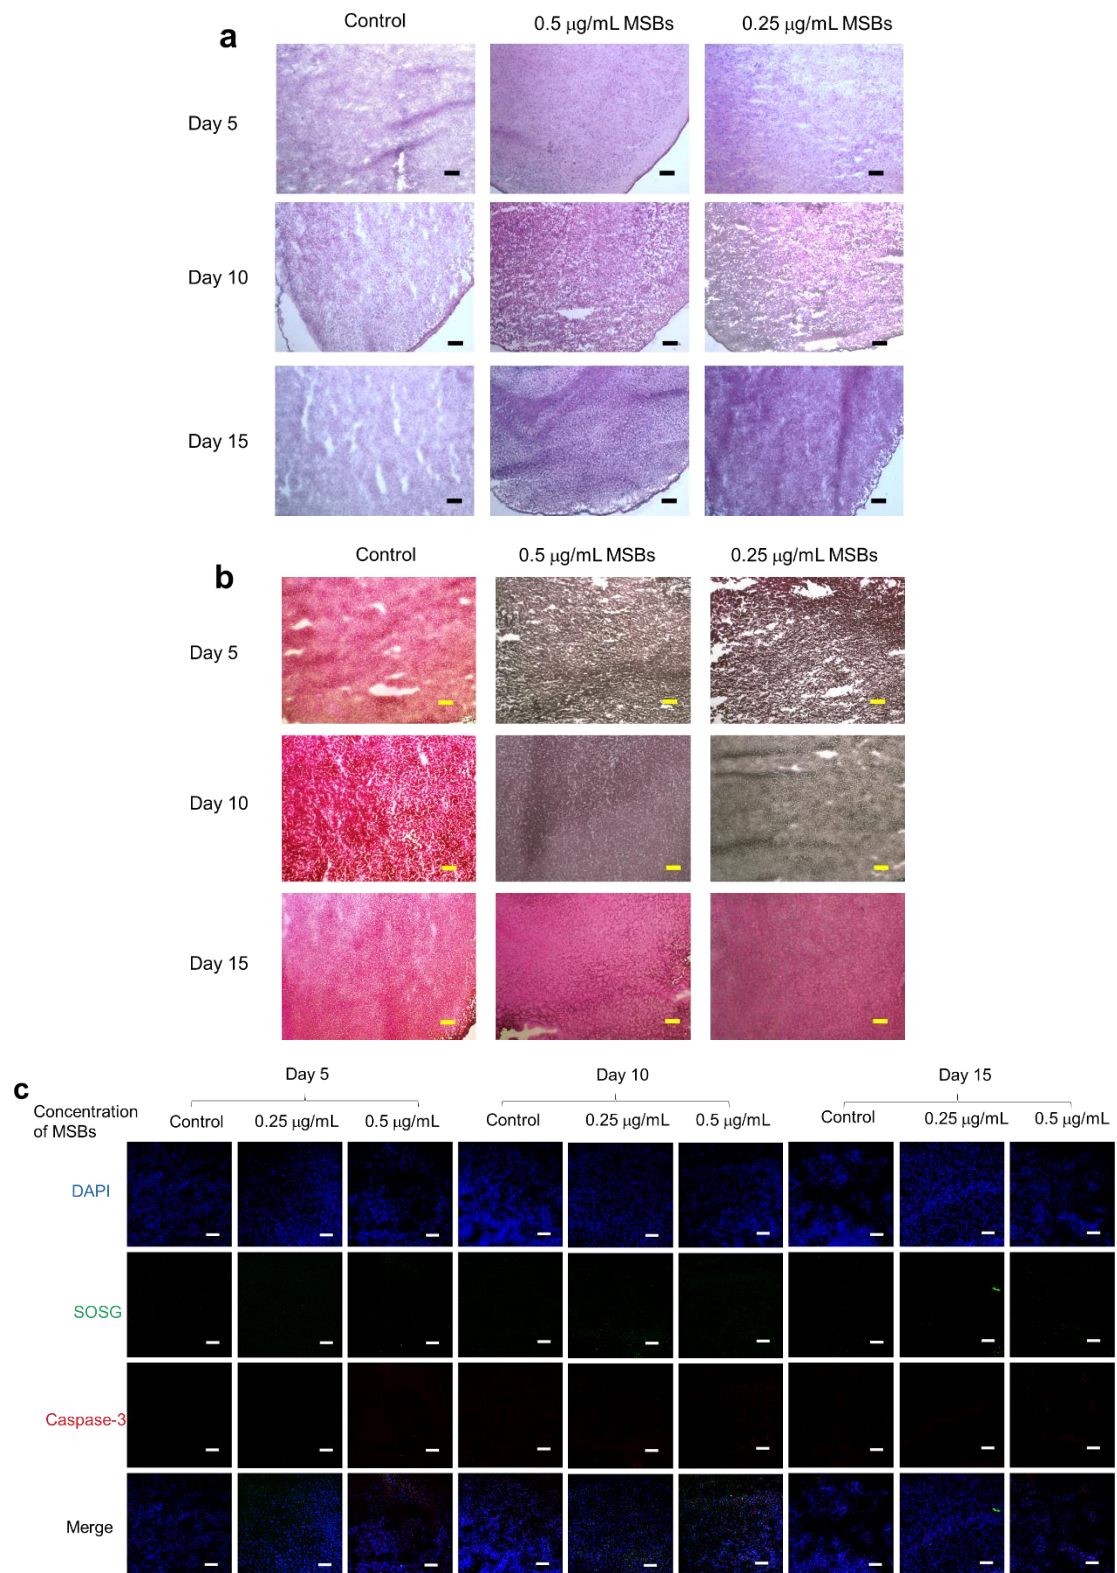

**Fig. S12** Brain tissue examination with (a) H&E (b) prussian blue (MSBs) and (c) DAPI (nuclei), SOSG (ROS) and caspase-3 (cell apoptosis) IHC staining from healthy C57BL/6J mice receiving MSB stirring treatment (2,400 rpm, 20 min) (n = 3). Scale bars for (a) and (b): 500  $\mu\text{m}$ . Scale bar for (c): 100  $\mu\text{m}$ .

## Supplementary Table

**Table S1** Characterization of OA-SPIONs and LA/OA-SPIONs by DLS

| Sample       | $D_h$ (nm) <sup>a</sup> | PDI <sup>b</sup> | $\zeta$ -potential (mV) |
|--------------|-------------------------|------------------|-------------------------|
| OA-SPIONs    | 34±2                    | 0.15±0.01        | -                       |
| LA/OA-SPIONs | 40±2                    | 0.10±0.01        | -34.4±0.4               |

<sup>a</sup>Mean hydrodynamic particle diameters of OA-SPIONs in hexane and LA/OA-SPIONs in PBS. <sup>b</sup>Polydispersity index.
